# Supplementary material
Source: PubMed Central journal article supplement (PMC33185)
Supplement: pnas_071050398_1.pdf [file pnas_071050398_1.pdf]

**Table 2.** Metabolic characteristics of MCK-hLAR mice

| Genotype  | Males           |                             |                          |                        |                     |
|-----------|-----------------|-----------------------------|--------------------------|------------------------|---------------------|
|           | 4 months        | 3-6 months                  |                          |                        |                     |
|           | Weight, g       | Fasted blood glucose, mg/dl | Fed blood glucose, mg/dl | Fasted FFA, mmol/liter | Fed FFA, mmol/liter |
| Wild-type | 28.5 ± 0.5 (30) | 100 ± 9 (5)                 | 143 ± 4 (22)             | 1.30 ± 0.07 (8)        | 0.31 ± 0.12 (11)    |
| MCK-hLAR  | 29.3 ± 0.8 (24) | 107 ± 14 (5)                | 143 ± 5 (20)             | 1.37 ± 0.14 (6)        | 0.33 ± 0.16 (14)    |

| Genotype  | Females         |                             |                          |                        |                     |
|-----------|-----------------|-----------------------------|--------------------------|------------------------|---------------------|
|           | 4 months        | 3-7 months                  |                          |                        |                     |
|           | Weight, g       | Fasted blood glucose, mg/dl | Fed blood glucose, mg/dl | Fasted FFA, mmol/liter | Fed FFA, mmol/liter |
| Wild-type | 22.7 ± 0.5 (14) | 60 ± 5 (10)                 | 133 ± 5 (10)             | ND                     | 0.23 ± 0.03 (10)    |
| MCK-hLAR  | 22.3 ± 0.5 (17) | 57 ± 1 (6)                  | 135 ± 4 (8)              | ND                     | 0.29 ± 0.03 (8)     |

Data are expressed as means ± SEM. Numbers of animals in each group are in parentheses. Fasting values were obtained after a 16- to 18-h overnight fast. Fed values were obtained between 8 and 10 a.m. There were no differences in these parameters between 3 and 7 months; therefore, data for mice over this age range were combined. For insulin values in males see Fig. 2a. FFA, free fatty acids; ND, not done.
